# Supplementary material
Source: PubMed Central journal article supplement (PMC3708356)
Supplement: supp_M030163_jlr.M030163-1.pdf [file supp_M030163_jlr.M030163-1.pdf]

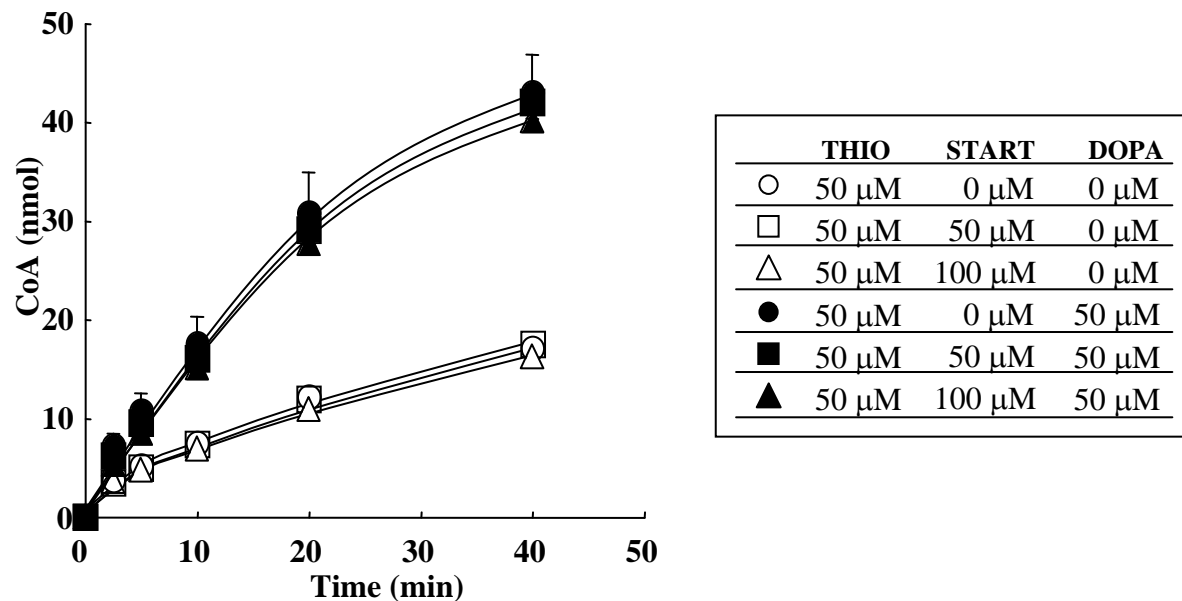

**Supplemental Figure 1. Influence of START on thioesterase activity of THIO.**

Time course for hydrolysis of acetyl-CoA by THIO alone or in combination with START. Proteins were assayed in the presence or absence of DOPA. Values are shown as the mean  $\pm$  S.D. (n = 3).

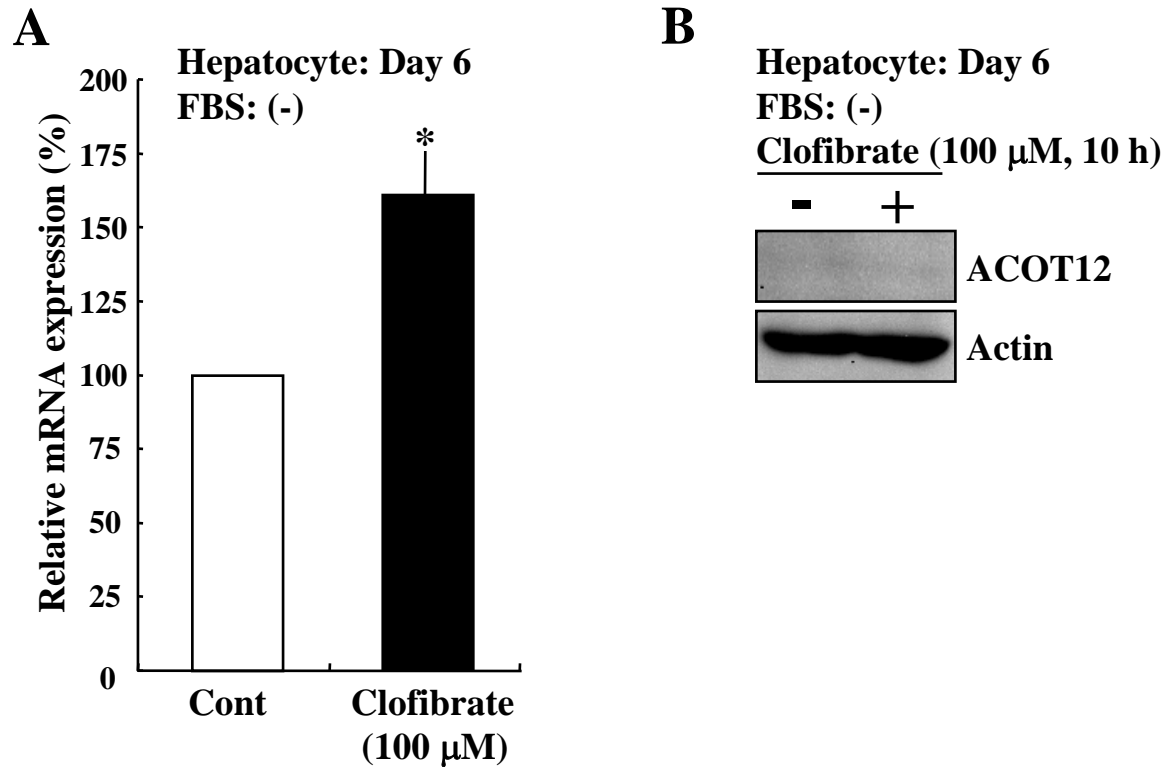

**Supplemental Figure 2. Influence of clofibrate on Day 6 hepatocytes**

Rat primary hepatocytes (Day6) were incubated with or without clofibrate (100  $\mu$ M) for 10 h in the absence of FBS. The amounts of ACOT12 mRNA (A) and protein (B) were determined. Values are shown as the mean  $\pm$  S.D. from three independent culture dishes. \* $p < 0.005$  as compared to control cells incubated with vehicle.  $\beta$ -Actin was used as a loading control.
